# Supplementary material for: Construction and selective gas adsorption properties of two heteroSBU MOFs based on unsymmetrical tetracarboxylate linkers
Source: Royal Society of Chemistry journal article supplement (doi:10.1039/d0ce01014f), 2020-01-01
Supplement: d0ce01014f1.pdf [file d0ce01014f1.pdf]

**Construction and gas adsorption properties of two heteroSBU MOFs  
based on unsymmetrical tetracarboxylate linkers**

Tingting Xu, Lihui Fan, Ping Zhou, Zhenzhen Jiang, Haonan Chen, Huangyan Lu and  
Yabing He\*

Key Laboratory of the Ministry of Education for Advanced Catalysis Materials,  
College of Chemistry and Life Sciences, Zhejiang Normal University, Jinhua 321004,  
China. E-mail: heyabing@zjnu.cn

### Fitting of Pure-Component Isotherm data

The pure-component C<sub>2</sub>H<sub>2</sub>, CO<sub>2</sub> and CH<sub>4</sub> adsorption isotherms measured at 278 K, 288 K and 298 K were fitted with the single-site Langmuir-Freundlich model

$$q = \frac{q_{\text{sat}} b p^{\nu}}{1 + b p^{\nu}}, \text{ with } T\text{-dependent parameter } b = b_0 \exp\left(\frac{E_a}{RT}\right)$$

where  $q$  is the adsorbed amount (mmol g<sup>-1</sup>),  $q_{\text{sat}}$  is the monolayer adsorption capacity (mmol g<sup>-1</sup>),  $p$  is the equilibrium pressure (kPa), and  $b$  and  $\nu$  is the Langmuir and Freundlich constants. The corresponding fitting parameters are provided in Table S2-3 in the supporting information. Fig S6 in the supporting information provides a comparison of the experimental isotherm data for C<sub>2</sub>H<sub>2</sub>, CO<sub>2</sub> and CH<sub>4</sub> in **ZJNU-9** with the isotherm fits. Fig S7 in the supporting information provides a comparison of the experimental isotherm data for C<sub>2</sub>H<sub>2</sub>, CO<sub>2</sub> and CH<sub>4</sub> in **ZJNU-10** with the isotherm fits.

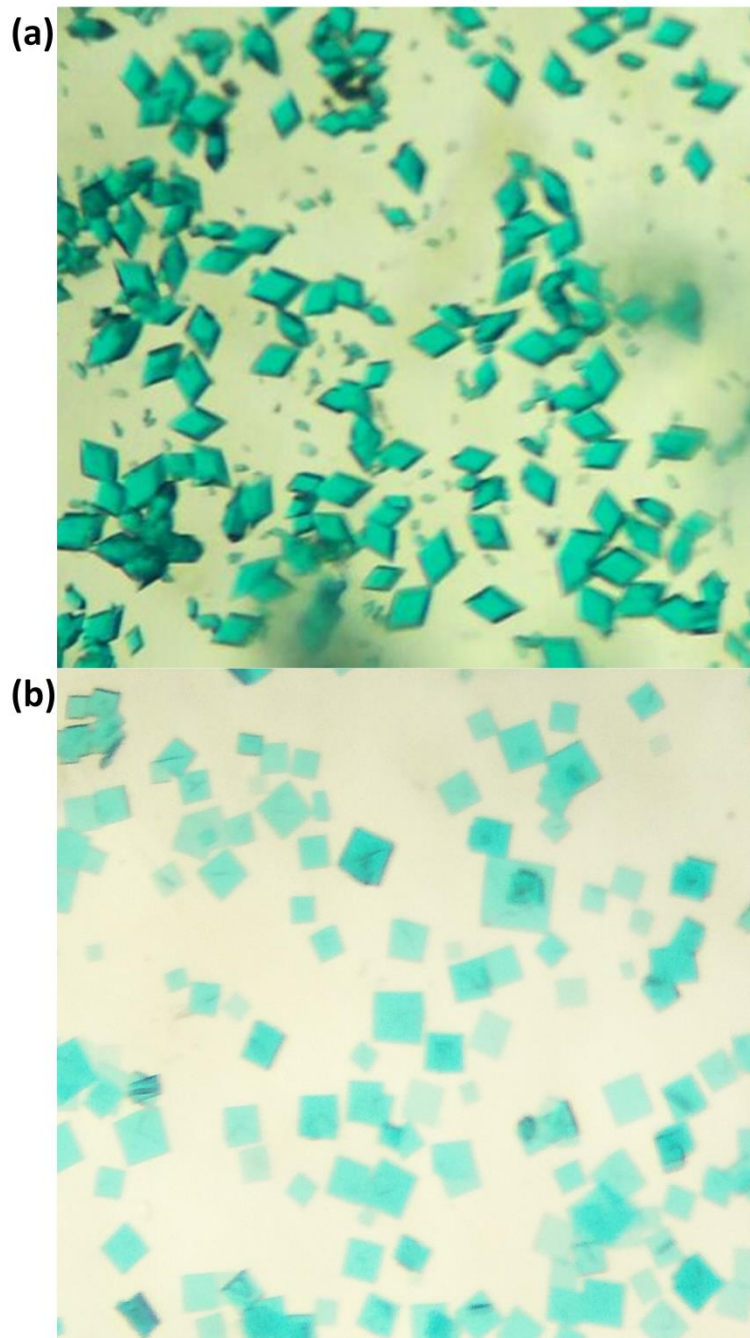

**Fig. S1** The electronic photographs of as-synthesized **ZJNU-9** and **ZJNU-10**

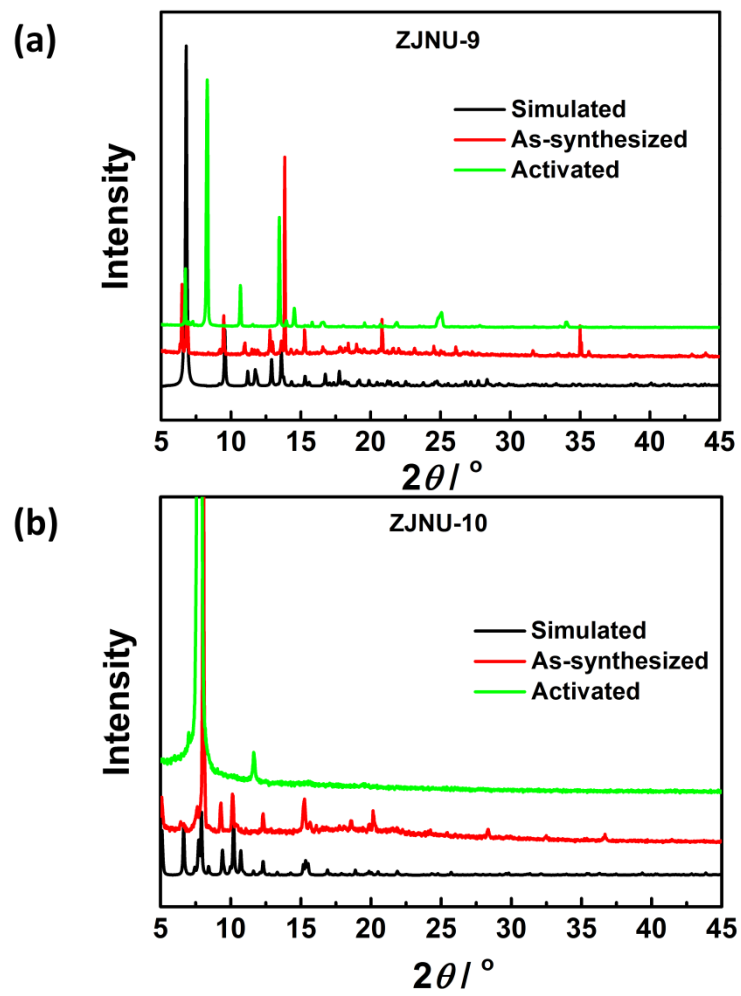

**Fig. S2** The experimental and simulated PXRD patterns of (a) **ZJNU-9** and (b) **ZJNU-10**.

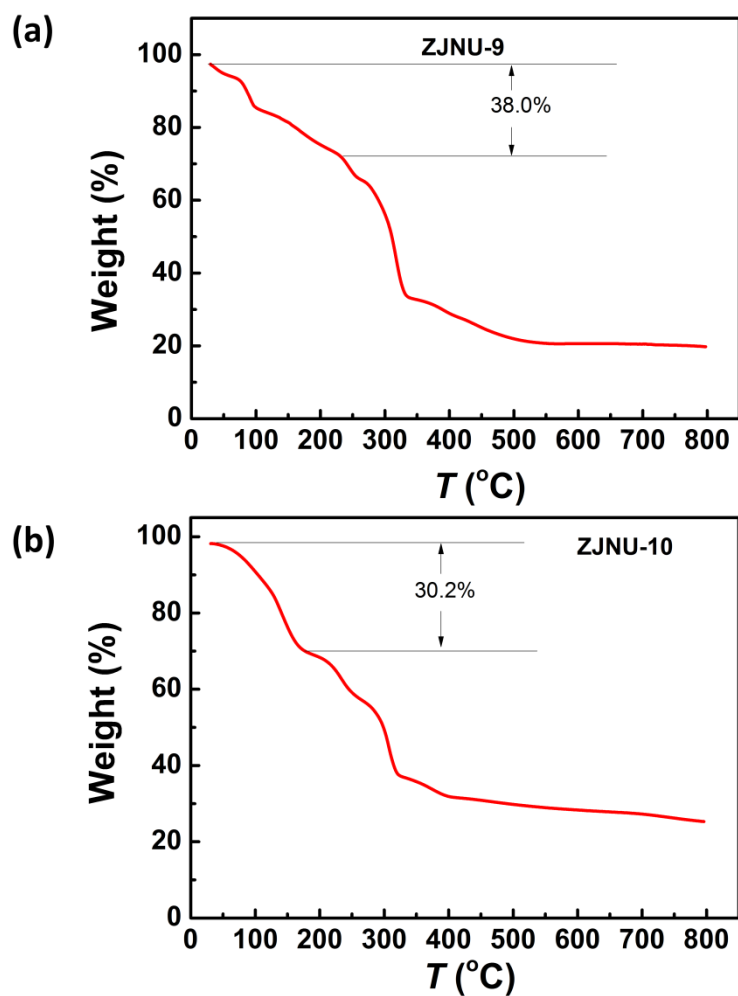

**Fig. S3** The TGA curves of the as-synthesized (a) **ZJNU-9** and (b) **ZJNU-10** under  $\text{N}_2$  atmosphere. For **ZJNU-9**, the weight loss of 38.0% before 505 K corresponds to the departure of 6.5 DMF and 5  $\text{H}_2\text{O}$  molecules *per* chemical formula. For **ZJNU-10**, the weight loss of 30.2% before 450 K corresponds to the departure of 11 DMA and 1  $\text{H}_2\text{O}$  molecules *per* chemical formula.

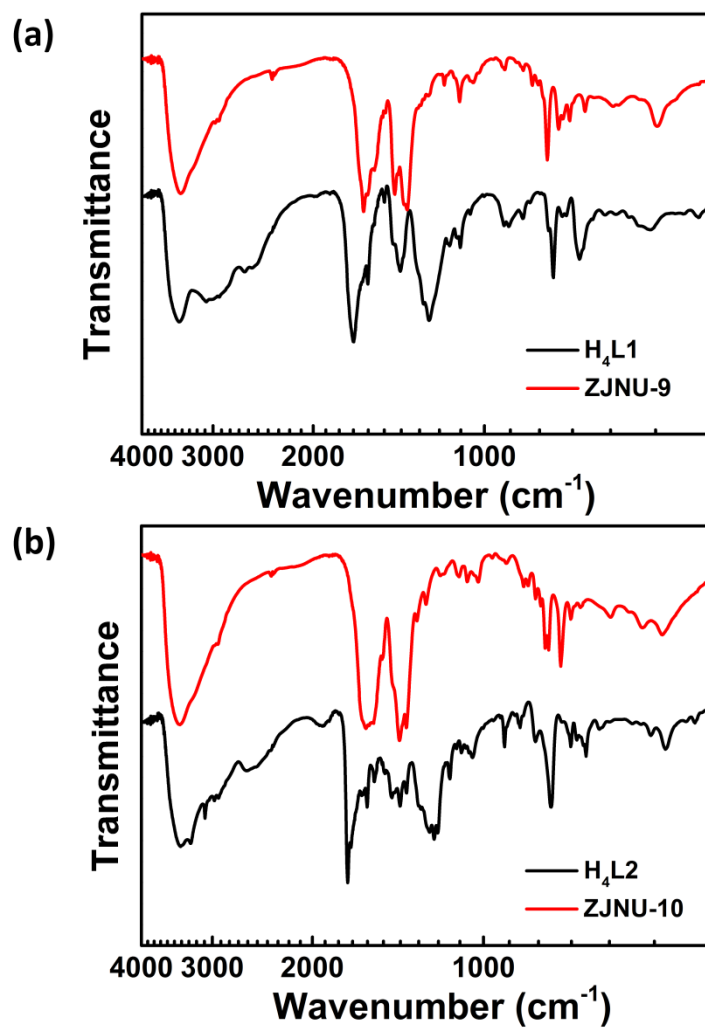

**Fig. S4** Comparison of the FTIR spectra of (a) **ZJNU-9** and its ligand H<sub>4</sub>L1, and (b) **ZJNU-10** and its ligand H<sub>4</sub>L2.

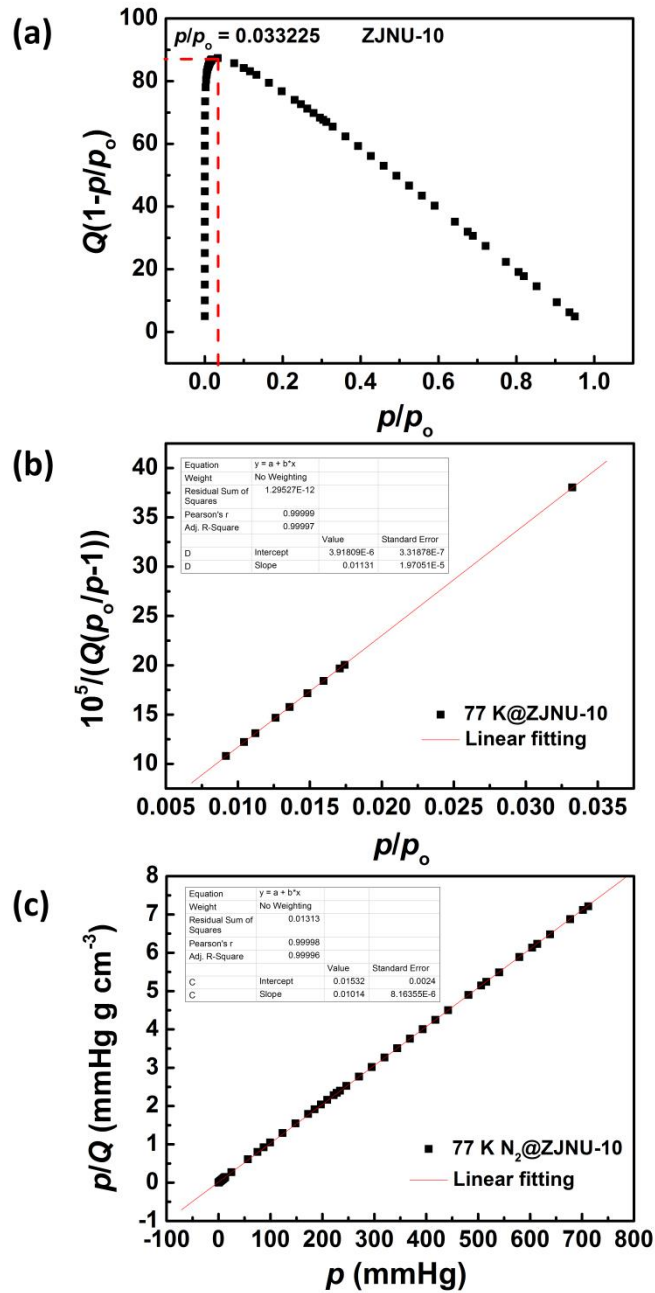

$$S_{\text{BET}} = 1/(3.91809 \times 10^{-6} + 0.01131)/22414 \times 6.023 \times 10^{23} \times 0.162 \times 10^{-18} = 385 \text{ m}^2 \text{ g}^{-1}$$

$$S_{\text{Langmuir}} = (1/0.01014)/22414 \times 6.023 \times 10^{23} \times 0.162 \times 10^{-18} = 429 \text{ m}^2 \text{ g}^{-1}$$

$$\text{BET constant } C = 1 + 0.01131/3.91809 \times 10^{-6} = 2888$$

$$(p/p_o)_{n_m} = \frac{1}{\sqrt{C+1}} = 0.01827$$

**Fig. S5** The consistency plot (a), BET surface area plot (b), and Langmuir surface area plot (c) for ZJNU-10.

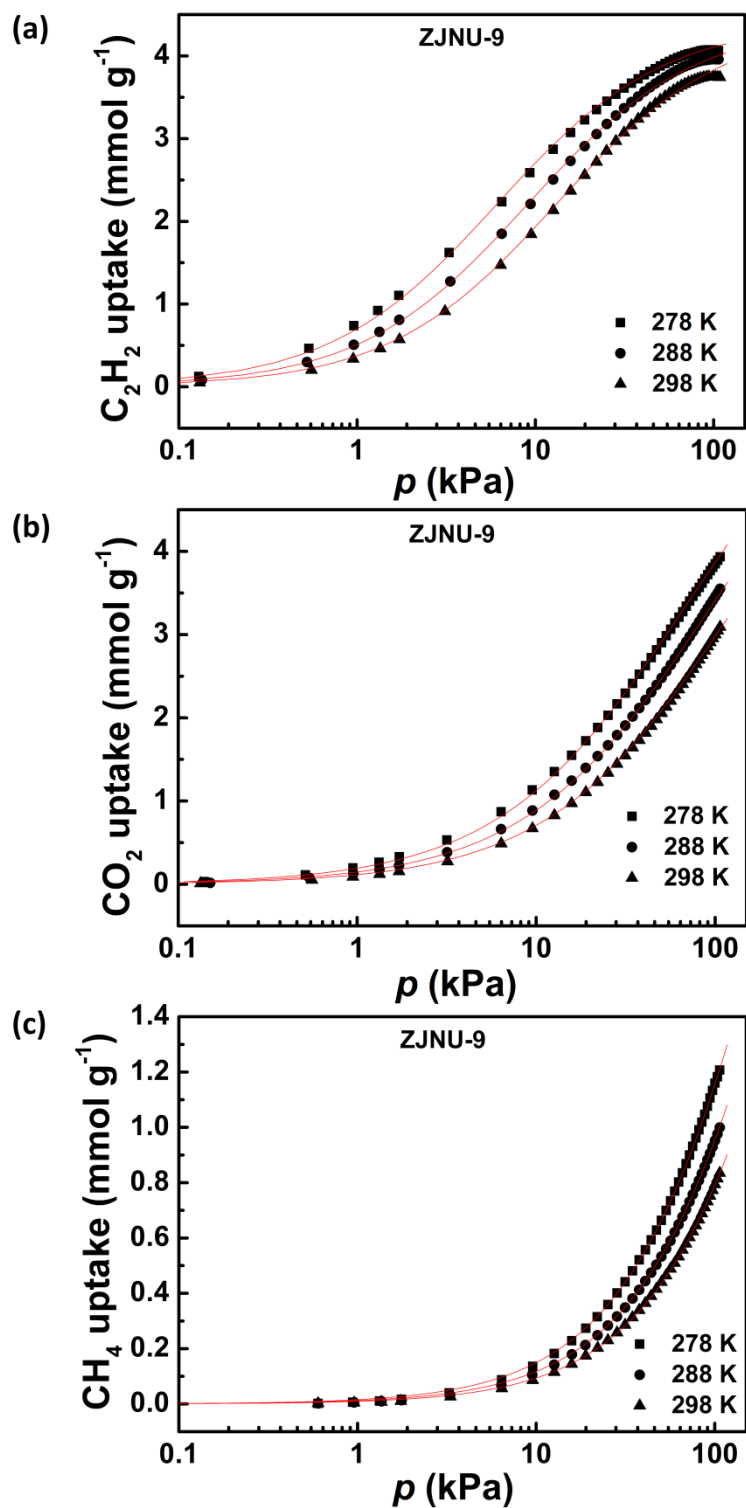

**Fig. S6** Comparison of the pure-component isotherm data for (a)  $\text{C}_2\text{H}_2$ , (b)  $\text{CO}_2$ , and (c)  $\text{CH}_4$  in **ZJNU-9** with the fitted isotherms at 278 K, 288 K, and 298 K.



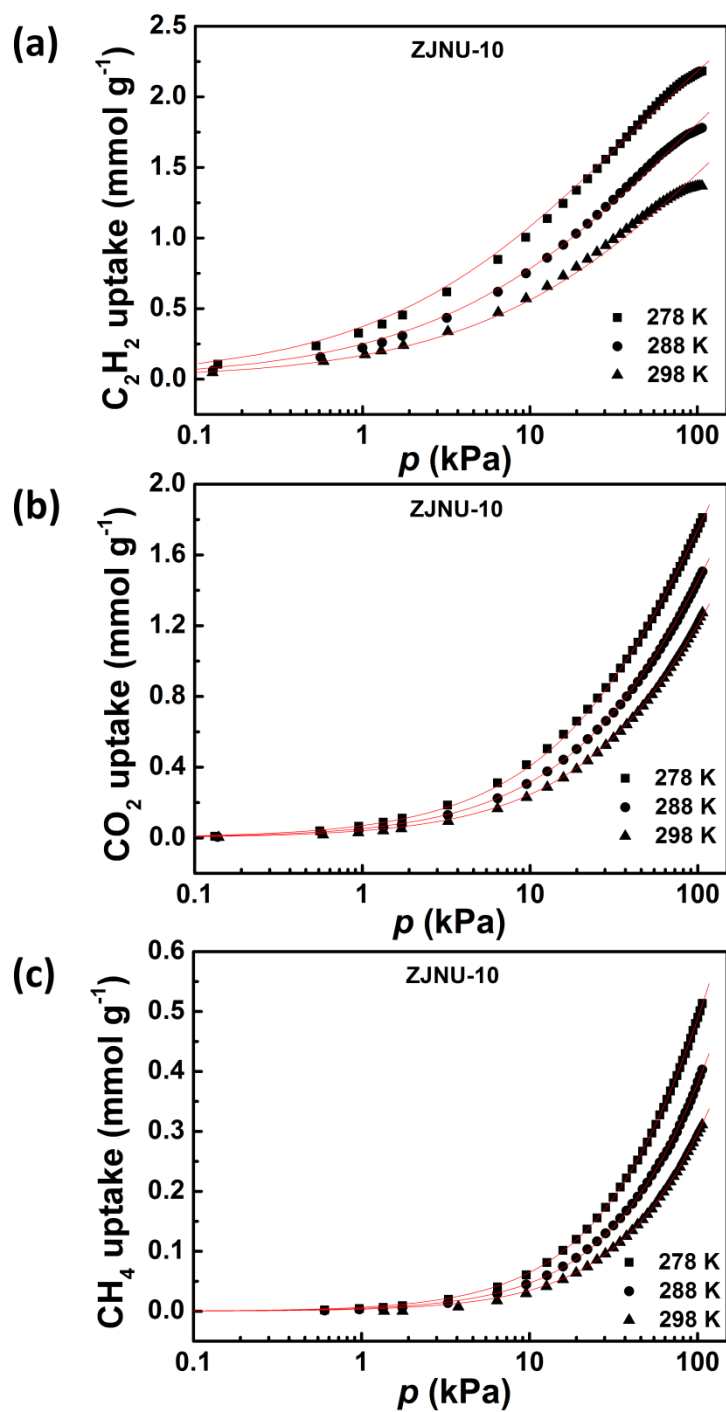

**Fig. S7** Comparison of the pure-component isotherm data for (a)  $\text{C}_2\text{H}_2$ , (b)  $\text{CO}_2$ , and (c)  $\text{CH}_4$  in **ZJNU-10** with the fitted isotherms at 278 K, 288 K, and 298 K.

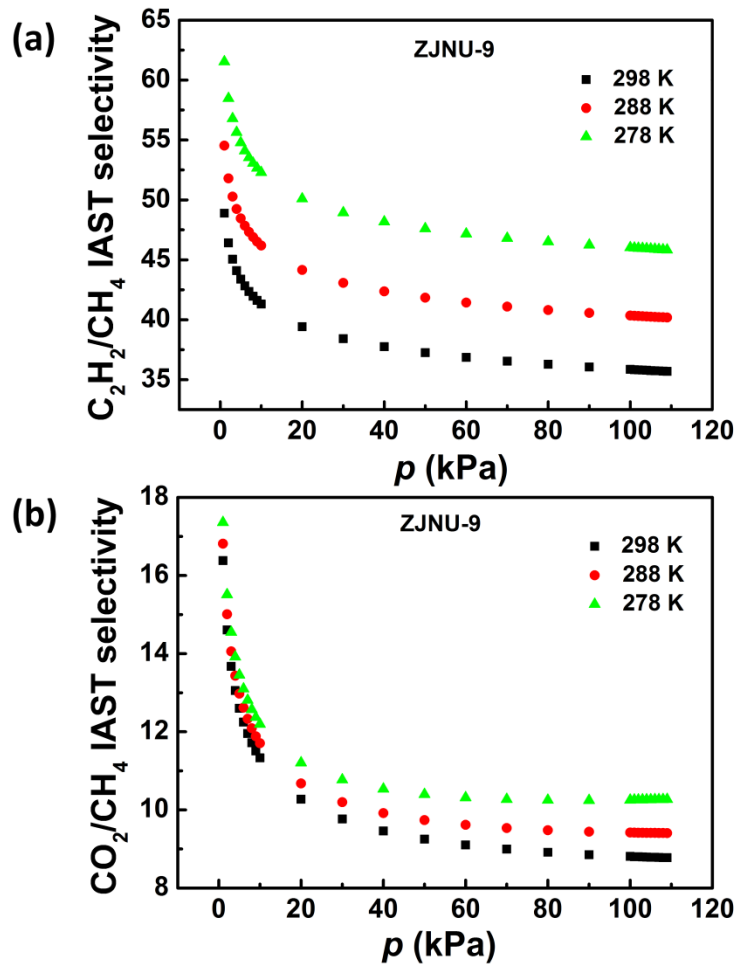

**Fig. S8** IAST calculations of (a)  $C_2H_2/CH_4$  and (b)  $CO_2/CH_4$  adsorption selectivities of **ZJNU-9** for the equimolar binary gas mixtures at three different temperatures of 298 K, 288 K, and 278 K.

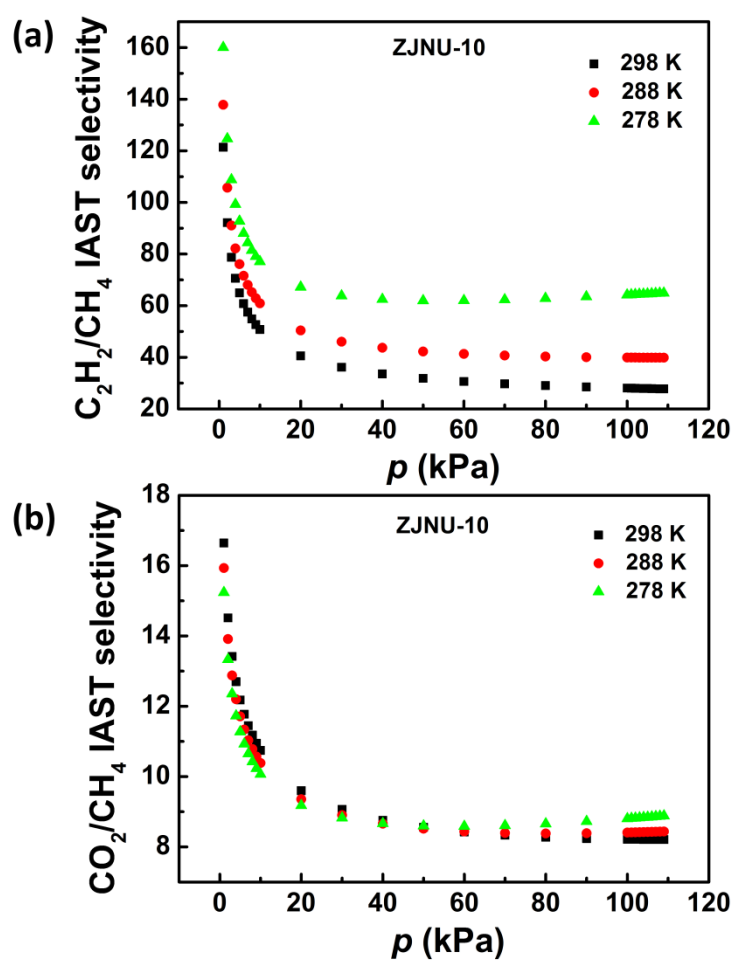

**Fig. S9** IAST calculations of (a)  $C_2H_2/CH_4$  and (b)  $CO_2/CH_4$  adsorption selectivities of **ZJNU-10** for the equimolar binary gas mixtures at three different temperatures of 298 K, 288 K, and 278 K.

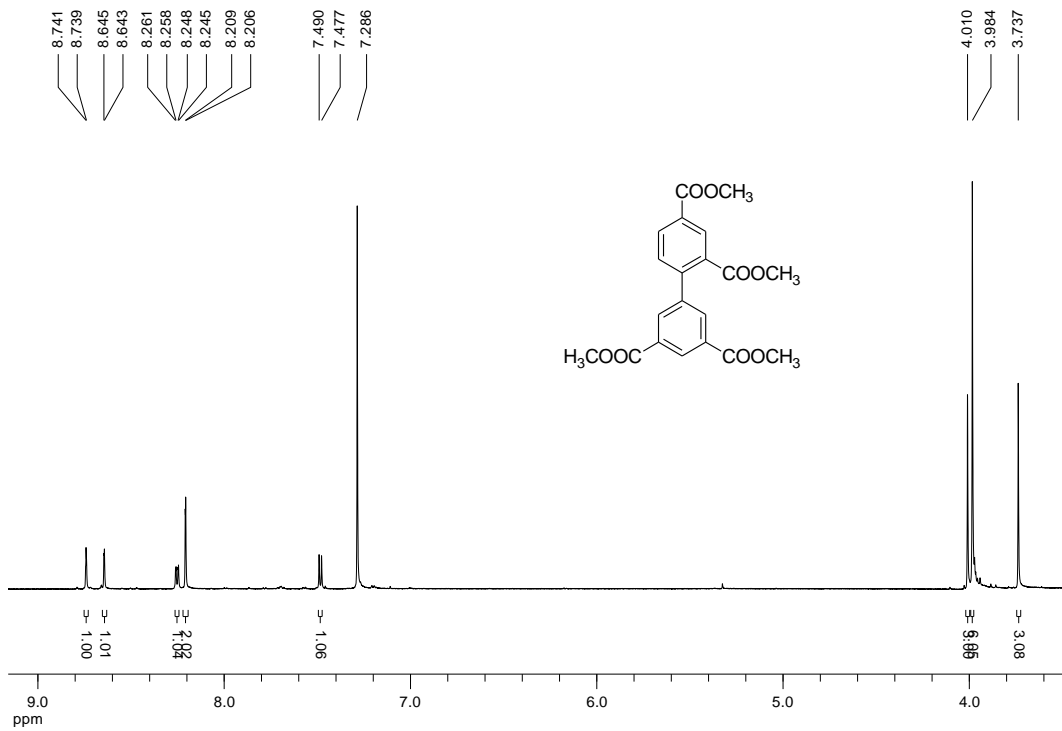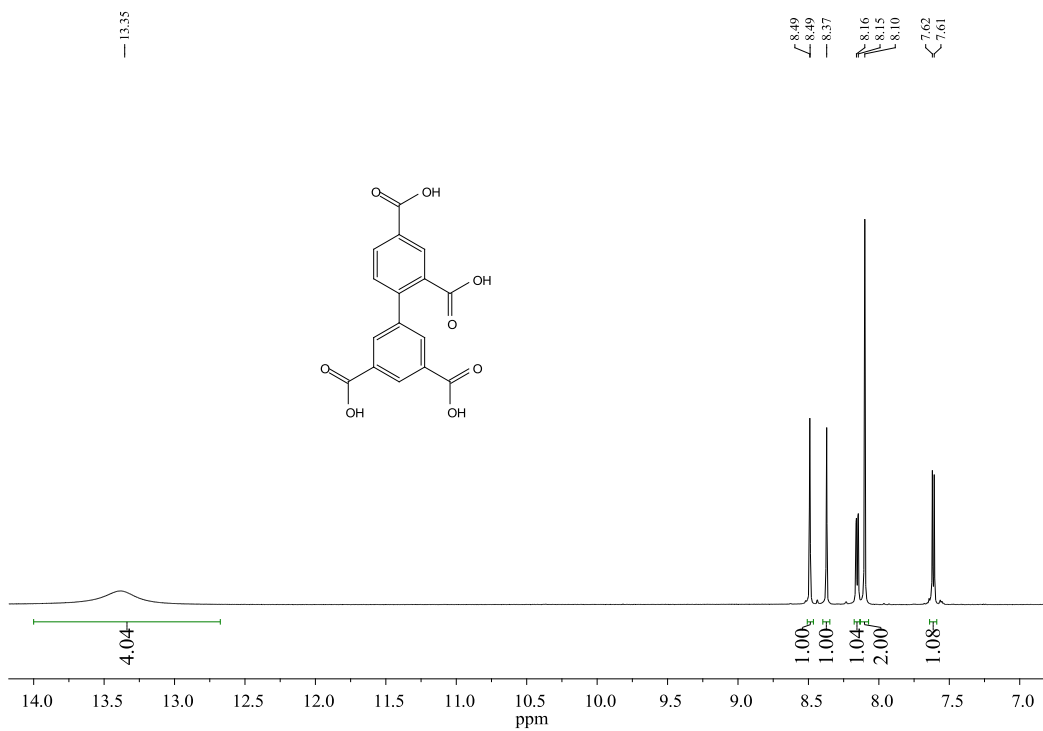

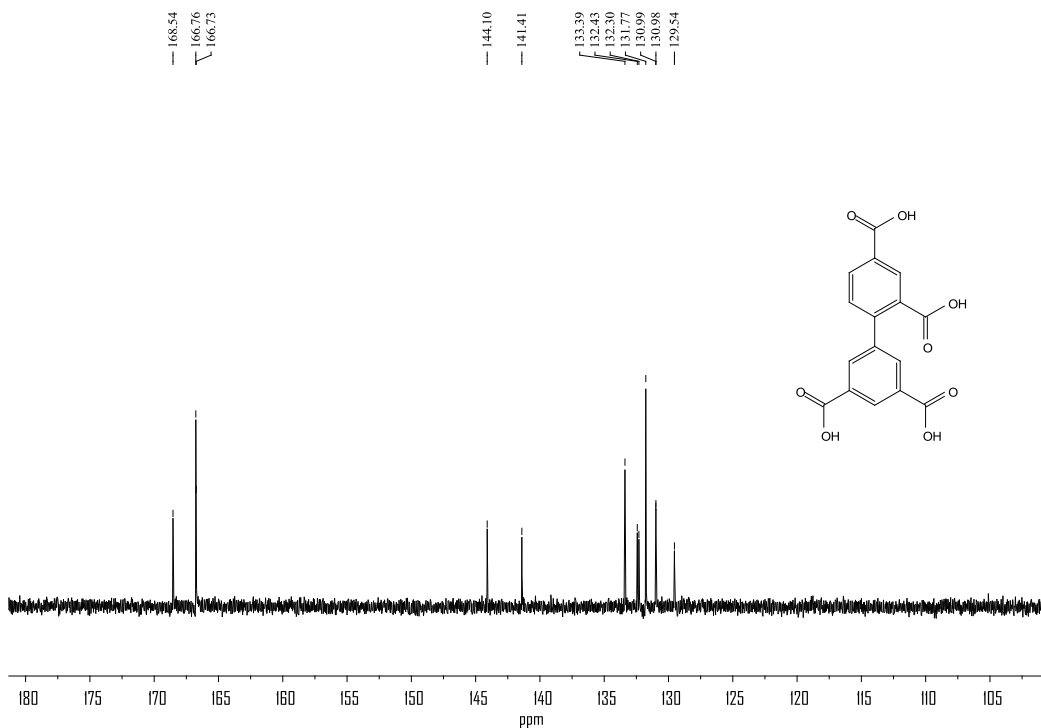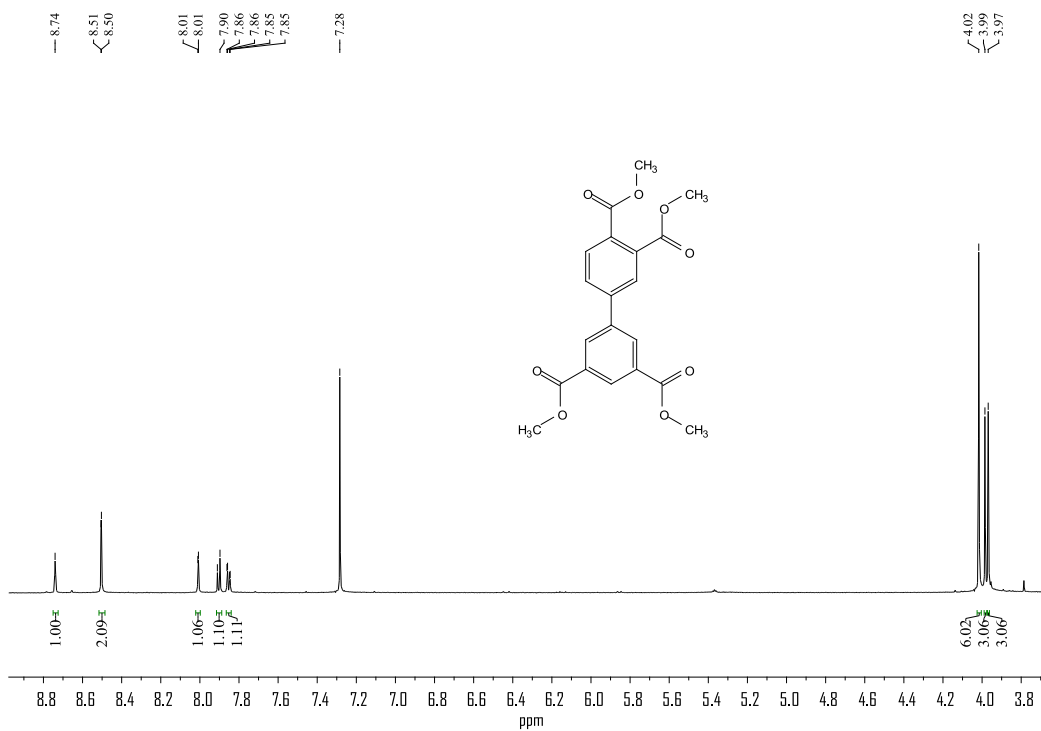

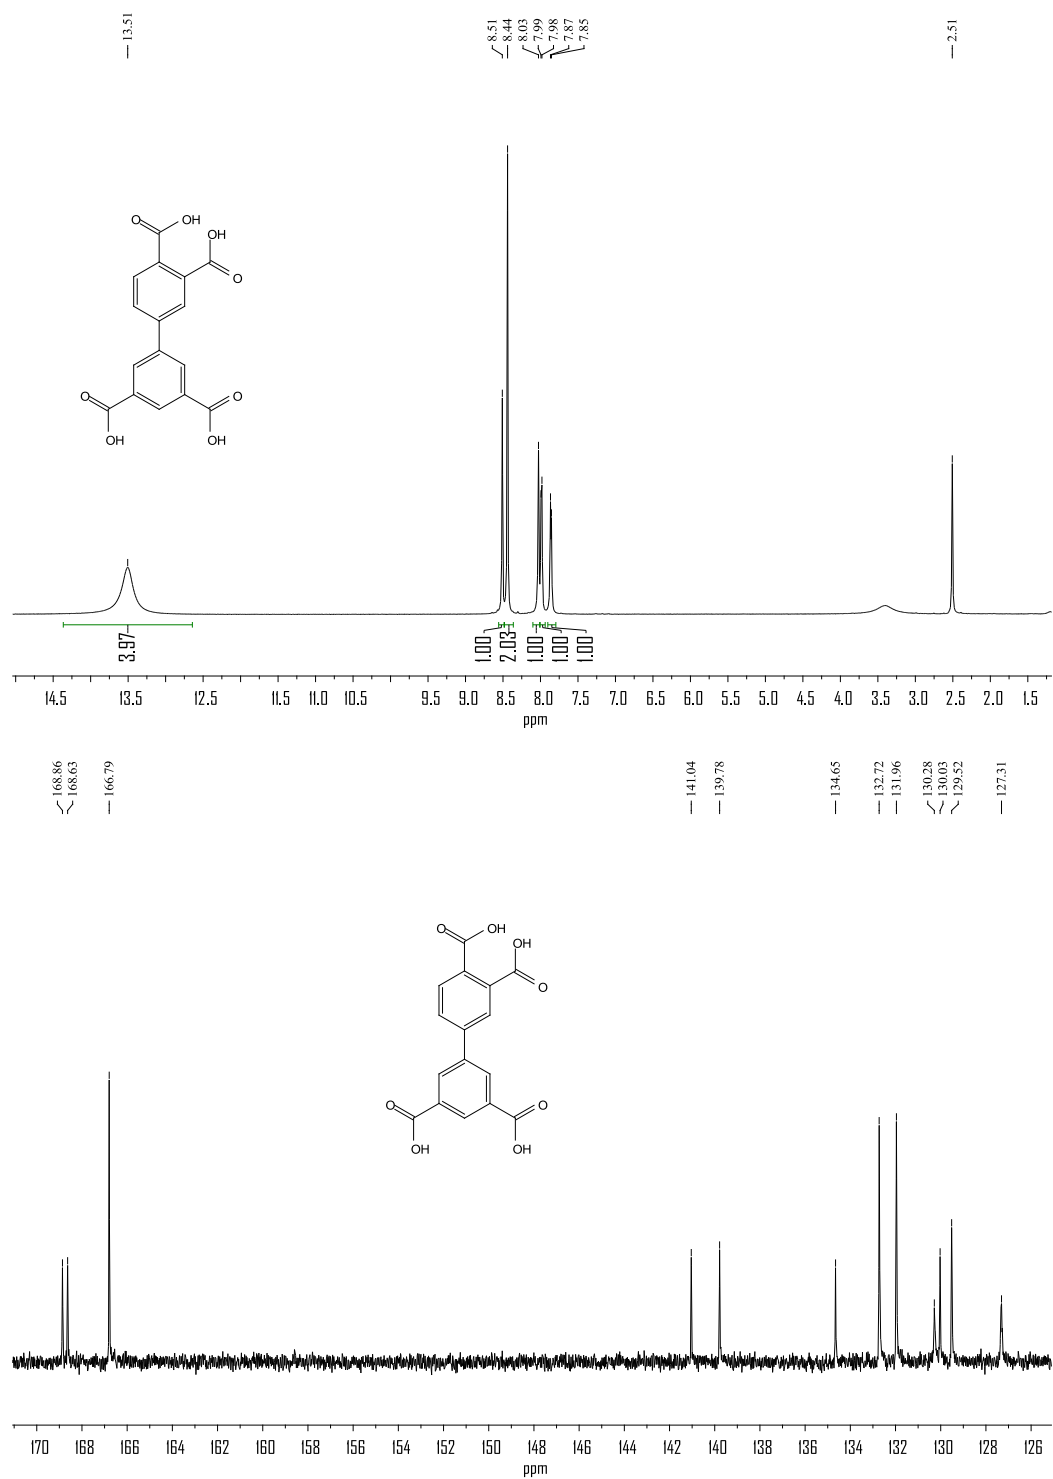

**Fig. S10** <sup>1</sup>H and <sup>13</sup>C NMR spectra

**Table S1** Crystal data and structure refinement for **ZJNU-9** and **ZJNU-10**.

| MOFs                                                          | <b>ZJNU-9</b>                                                                                                                                 | <b>ZJNU-10</b>                                                                                                                      |
|---------------------------------------------------------------|-----------------------------------------------------------------------------------------------------------------------------------------------|-------------------------------------------------------------------------------------------------------------------------------------|
| Empirical formula                                             | C <sub>51.5</sub> H <sub>67.5</sub> Cu <sub>4</sub> N <sub>6.5</sub> O <sub>27.5</sub>                                                        | C <sub>108</sub> H <sub>147</sub> Cl <sub>2</sub> Cu <sub>10</sub> N <sub>11</sub> O <sub>56</sub>                                  |
| Formula weight                                                | 1471.78                                                                                                                                       | 3201.66                                                                                                                             |
| $\lambda$ (Å)                                                 | 0.71073                                                                                                                                       | 0.71073                                                                                                                             |
| Crystal system                                                | Monoclinic                                                                                                                                    | Orthorhombic                                                                                                                        |
| Space group                                                   | <i>C2/m</i>                                                                                                                                   | <i>Cmmm</i>                                                                                                                         |
| Unit cell dimensions                                          | $a = 19.3334(10)$ Å<br>$b = 25.6921(12)$ Å<br>$c = 15.8595(13)$ Å<br>$\alpha = 90^\circ$<br>$\beta = 123.080(2)^\circ$<br>$\gamma = 90^\circ$ | $a = 26.5456(16)$ Å<br>$b = 44.633(3)$ Å<br>$c = 26.5717(16)$ Å<br>$\alpha = 90^\circ$<br>$\beta = 90^\circ$<br>$\gamma = 90^\circ$ |
| $V$ (Å <sup>3</sup> )                                         | 6600.8(7)                                                                                                                                     | 31482(3)                                                                                                                            |
| $Z$                                                           | 4                                                                                                                                             | 8                                                                                                                                   |
| $D_c$ (g cm <sup>-3</sup> )                                   | 1.481                                                                                                                                         | 1.351                                                                                                                               |
| $\mu$ (mm <sup>-1</sup> )                                     | 1.356                                                                                                                                         | 1.436                                                                                                                               |
| $F(000)$                                                      | 3032                                                                                                                                          | 13152                                                                                                                               |
| $\theta$ range for data collection (°)                        | 2.642 to 27.501                                                                                                                               | 2.194 to 25.032                                                                                                                     |
| Limiting indices                                              | $-25 \leq h \leq 25$<br>$-33 \leq k \leq 33$<br>$-17 \leq l \leq 20$                                                                          | $-31 \leq h \leq 31$<br>$-53 \leq k \leq 53$<br>$-31 \leq l \leq 25$                                                                |
| Reflections collected / unique                                | 28259 / 7683                                                                                                                                  | 82562 / 14419                                                                                                                       |
| $R_{int}$                                                     | 0.0242                                                                                                                                        | 0.1045                                                                                                                              |
| Max. and min. transmission                                    | 0.875 and 0.836                                                                                                                               | 0.866 and 0.866                                                                                                                     |
| Refinement method                                             | Full-matrix least-squares on $F^2$                                                                                                            | Full-matrix least-squares on $F^2$                                                                                                  |
| Data/restraints/parameters                                    | 7683 / 7 / 312                                                                                                                                | 14419 / 408 / 558                                                                                                                   |
| Goodness-of-fit on $F^2$                                      | 1.077                                                                                                                                         | 1.096                                                                                                                               |
| Final $R$ indices [ $I > 2\sigma(I)$ ]                        | $R_1 = 0.0482$<br>$wR_2 = 0.2030$                                                                                                             | $R_1 = 0.0660$<br>$wR_2 = 0.1571$                                                                                                   |
| $R$ indices (all data)                                        | $R_1 = 0.0524$<br>$wR_2 = 0.2133$                                                                                                             | $R_1 = 0.1389$<br>$wR_2 = 0.1891$                                                                                                   |
| Largest diff. peak and hole (e <sup>-</sup> Å <sup>-3</sup> ) | 2.588 and -4.979                                                                                                                              | 1.368 and -1.116                                                                                                                    |
| CCDC                                                          | 2016107                                                                                                                                       | 2016108                                                                                                                             |

**Table S2** Langmuir-Freundlich parameters for adsorption of C<sub>2</sub>H<sub>2</sub>, CO<sub>2</sub>, and CH<sub>4</sub> in ZJNU-9.

| Adsorbates                    | $q_{\text{sat}}$<br>(mmol g <sup>-1</sup> ) | $b_0$<br>(kPa) <sup>-<math>\nu</math></sup> | $E$<br>(kJ mol <sup>-1</sup> ) | $\nu$   | $R^2$   |
|-------------------------------|---------------------------------------------|---------------------------------------------|--------------------------------|---------|---------|
| C <sub>2</sub> H <sub>2</sub> | 4.41547                                     | 4.84947×10 <sup>-6</sup>                    | 24.426                         | 0.92377 | 0.9991  |
| CO <sub>2</sub>               | 6.67589                                     | 1.02283×10 <sup>-5</sup>                    | 18.441                         | 0.8319  | 0.99964 |
| CH <sub>4</sub>               | 4.57312                                     | 2.66966×10 <sup>-6</sup>                    | 16.510                         | 1       | 0.99987 |



**Table S3** Langmuir-Freundlich parameters for adsorption of C<sub>2</sub>H<sub>2</sub>, CO<sub>2</sub>, and CH<sub>4</sub> in ZJNU-10

| Adsorbates                    | $q_{\text{sat}}$<br>(mmol g <sup>-1</sup> ) | $b_0$<br>(kPa) <sup>-<math>\nu</math></sup> | $E$<br>(kJ mol <sup>-1</sup> ) | $\nu$   | $R^2$   |
|-------------------------------|---------------------------------------------|---------------------------------------------|--------------------------------|---------|---------|
| C <sub>2</sub> H <sub>2</sub> | 3.44993                                     | 3.57848×10 <sup>-7</sup>                    | 29.434                         | 0.57534 | 0.99647 |
| CO <sub>2</sub>               | 4.59353                                     | 4.81721×10 <sup>-6</sup>                    | 18.662                         | 0.79866 | 0.99973 |
| CH <sub>4</sub>               | 1.79571                                     | 2.87535×10 <sup>-7</sup>                    | 21.890                         | 1       | 0.99982 |

**Table S4** Summarizes of physical parameters of C<sub>2</sub>H<sub>2</sub>, CO<sub>2</sub>, and CH<sub>4</sub>

| Adsorbates                    | BP<br>(K) | $T_c$<br>(K) | $p_c$<br>(bar) | Kinetic<br>diameter<br>(Å) | Molecular<br>dimension<br>(Å) | Polarizability<br>( $\times 10^{25}$ cm <sup>3</sup> ) | Dipole moment<br>( $\times 10^{18}$ esu cm) | Quadruple<br>moment<br>( $\times 10^{26}$ esu cm <sup>2</sup> ) |
|-------------------------------|-----------|--------------|----------------|----------------------------|-------------------------------|--------------------------------------------------------|---------------------------------------------|-----------------------------------------------------------------|
| C <sub>2</sub> H <sub>2</sub> | 188.40    | 308.30       | 61.14          | 3.3                        | 3.3×3.3×5.7                   | 33.3-39.3                                              | 0                                           | +7.5                                                            |
| CO <sub>2</sub>               | 194.65    | 304.12       | 73.74          | 3.3                        | 3.2×3.3×5.4                   | 29.11                                                  | 0                                           | -4.3                                                            |
| CH <sub>4</sub>               | 111.66    | 190.56       | 45.99          | 3.758                      | 3.7×3.7×3.7                   | 25.93                                                  | 0                                           | 0                                                               |

BP: normal boiling point;  $T_c$ : critical temperature;  $p_c$ : critical pressure

**Table S5** Summaries of gas adsorption properties of **ZJNU-9** and **ZJNU-10**

| MOFs                                                                                   |       | <b>ZJNU-9</b> | <b>ZJNU-10</b> |
|----------------------------------------------------------------------------------------|-------|---------------|----------------|
| $S_{\text{BET}}/S_{\text{Langmuir}}$ ( $\text{m}^2 \text{g}^{-1}$ )                    |       | 11/17         | 385/429        |
| $V_p$ ( $\text{cm}^3 \text{g}^{-1}$ )                                                  |       | 0.00154       | 0.153          |
| $\text{C}_2\text{H}_2$ uptake <sup>a</sup><br>( $\text{cm}^3 \text{g}^{-1}$ , STP)     | 298 K | 83.9          | 30.7           |
|                                                                                        | 288 K | 88.7          | 39.9           |
|                                                                                        | 278 K | 91.1          | 48.9           |
| $\text{CO}_2$ uptake <sup>a</sup><br>( $\text{cm}^3 \text{g}^{-1}$ , STP)              | 298 K | 69.3          | 28.5           |
|                                                                                        | 288 K | 79.6          | 33.8           |
|                                                                                        | 278 K | 88.2          | 40.6           |
| $\text{CH}_4$ uptake <sup>a</sup><br>( $\text{cm}^3 \text{g}^{-1}$ , STP)              | 298 K | 18.7          | 7.0            |
|                                                                                        | 288 K | 22.4          | 9.0            |
|                                                                                        | 278 K | 27.1          | 11.5           |
| $\text{C}_2\text{H}_2/\text{CH}_4$ IAST <sup>a</sup><br>( $v/v = 1/1$ )<br>selectivity | 298 K | 35.7          | 27.8           |
|                                                                                        | 288 K | 40.2          | 39.8           |
|                                                                                        | 278 K | 45.8          | 64.9           |
| $\text{CO}_2/\text{CH}_4$ IAST <sup>a</sup><br>( $v/v = 1/1$ )<br>selectivity          | 298 K | 8.8           | 8.2            |
|                                                                                        | 288 K | 9.4           | 8.4            |
|                                                                                        | 278 K | 10.3          | 8.9            |

$S_{\text{BET}}/S_{\text{Langmuir}}$  = BET and Langmuir surface areas;  $V_p$  = total pore volume; <sup>a</sup> at 1 atm; STP = standard temperature and pressure
